# Supplementary material for: Water activity and surface tension of aqueous ammonium sulfate and D-glucose aerosol nanoparticles
Source: Copernicus journal article supplement (doi:10.5194/egusphere-2023-1815), 2023-08-23
Supplement: Supplementary file [file egusphere-2023-1815-AC1-supplement.pdf]

Response to referee #1

The referee's comments are in italics, our responses in plain font.

*In this manuscript, the authors derived water activity and surface tension from hygroscopic growth of aerosol particles smaller than 100 nm composed of aqueous ammonium sulfate, D-glucose, and their mixtures. The hygroscopic growth of particles was measured over a wide range of RH from 2.0% to 99.6% using a high humidity tandem differential mobility analyzer (HHTDMA). The derived water activity and surface tension were compared with those from electrodynamic balance and bulk measurements and thermodynamic model predictions (E-AIM and UNIFAC). Overall, the manuscript is well written, and the topic fits the scope of Atmospheric Chemistry and Physics very nicely. I recommend the manuscript for publication after the authors address the following comments.*

We thank referee #1 for suggestions for improvement that were taken into account upon manuscript revision. Responses to individual comments are given below.

*Major comment:*

*The authors derived water activity and surface tension using differential Kohler analysis, i.e., fitting parameters for the  $s(D_s)$  dependence with the same  $g_b$  (i.e., Eq. 3). This approach assumes that water activity and surface tension depend on  $g_b$  only (i.e., independent of  $D_s$ ). However, due to surface-bulk partitioning, both water activity and surface tension also depend on  $D_s$  (i.e., surface area to volume ratio). I would suggest that the authors include relevant discussions on how such dependence affects the accuracy of derived water activity and surface tension and conclusion of this study.*

Line 122 and below, the following text has been added:

According to Eq.(3), DKA assumes that water activity and surface tension depend on  $g_b$  only (i.e. concentration). However, in case of bulk-surface partitioning, both water activity and surface tension may also depend on  $D_s$ . To minimize this effect, we used surface inactive compounds. Previous studies on the example of NaCl and  $(\text{NH}_4)_2\text{SO}_4$  nanoparticles have shown that the size effect is negligible for such compounds (Bahadur and Russell, 2008; Cheng et al., 2015, Supplement)

New reference: Bahadur, R. and Russell, L. M.: Effect of surface tension from MD simulations on size-dependent deliquescence of NaCl nanoparticles, *Aerosol Sci. Technol.*, 42(5), 369-376, <https://doi.org/10.1080/02786820802104965>, 2008.

Line 326 and below, new text has been inserted instead of old one:

As mentioned above, DKA assumes that thermodynamic parameters depend only on concentration and are independent of particle size. Good agreement of DKA-derived  $a_w$  and  $\sigma$  with the literature data, showed that for particles in the size range of 20-100 nm, this approach is acceptable for single-component solutions of AS and GI and their mixtures, at least at moderate concentrations. Additional HHTDMA-DKA studies are needed to evaluate the accuracy of this approximation for nanoparticles containing surface-active molecules. We plan to conduct such studies to compare the DKA-derived  $a_w$  and  $\sigma$  with available experimental data and models that account for size-dependent bulk-surface partitioning.

*Minor comments:*

*Line 188-189: The growth factor is a monotonic function of RH (first derivative is consistently above zero).*

The text was modified as following:

The measurement data in Fig. 3b and Fig. 3d also demonstrate that for D-glucose and AS/GI (1:1) particles in the vicinity of  $RH \approx 48\%$  the  $g_b(RH)$  dependence has an inflection point, (derivative  $dg_b/dRH$  has extremum, see insert in Fig. 3b and Fig. 3c) indicating a distinct water sorption mechanism, and hence a different phase state of the particles before and after this RH point.

*Line 205-210: Please provide more details on how the uncertainties are estimated.*

Line 89, the following sentence has been added: A detailed calculation of growth factor uncertainty is described in Mikhailov et al., 2020 (Section 2.5).
